# Supplementary material for: High Heat Flux Testing of Graded W-Steel Joining Concepts for the First Wall
Source: MDPI journal article supplement (doi:10.3390/en16093664), 2023-04-24
Supplement: s1 [file s1]

Archive with 1 entries (1 files):
- energies-2319197-supplementary.pdf
